# Supplementary material
Source: PubMed Central journal article supplement (PMC2586687)
Supplement: neo1012_1362SD1.pdf [file neo1012_1362SD1.pdf]

**Table W1.** Primer Sequences.

| Use        | Primer ID     | Sequences                                                      |                                                               |
|------------|---------------|----------------------------------------------------------------|---------------------------------------------------------------|
| Southern   | NF1 Probe 1-F | CCTTCITTTGACTGTTGATGTAGT                                       |                                                               |
|            | NF1 Probe 1-R | TTATGCAGGAATGGGTTATGGA                                         |                                                               |
|            | NF1 Probe 2-F | AGAGCCTATGCGTTTTGAGAAGTATGAC                                   |                                                               |
|            | NF1 Probe 2-R | TATTGGTGTGGTTGTTTGGTGTGTAG                                     |                                                               |
|            | NF1 Probe 3-F | ACCAAGGCCTTCTCACTAACT                                          |                                                               |
|            | NF1 Probe 3-R | TAACCAAAAAGCTTCAACACTATG                                       |                                                               |
|            | DHX40-F       | GGCAGTTTCCATTTTGTTCCTGTCC                                      |                                                               |
| Northern   | DHX40-R       | CATTACCACCACCACCCTCTCCA                                        |                                                               |
|            | NF1-F         | AGGGCCAGTTACTAGAGACATCAG                                       |                                                               |
|            | NF1-R         | AAGTAACAACGTGGAAGAGGTAGG                                       |                                                               |
|            | GAPDH-F       | CAGACCACAGTCCATGCCATCAC                                        |                                                               |
| Sequencing | GAPDH-R       | CCATGAGGTCCACCACCCTGTTGC                                       |                                                               |
|            | Kras ex2-F    | GCCTGCTGAAAATGACTGAAT                                          |                                                               |
|            | Kras ex2-R    | GGTCCTGCACCAGTAATATGC                                          |                                                               |
|            | BRAF-ex11-F   | TCTCTTCCTGTATCCCTCTCAGGCA                                      |                                                               |
|            | BRAF-ex11-R   | CTTGTACAATGTCACCACATTACA                                       |                                                               |
|            | BRAF-ex15-F   | CCTAAACTCTTCATAATGCTTGCTCTG                                    |                                                               |
|            | BRAF-ex15-R   | TAACTCAGCAGCATCTCAGGGCCAAA                                     |                                                               |
|            | TP53-5F       | TTTATCTGTTCACTTGTGCCC                                          |                                                               |
|            | TP53-5R       | ACCCTGGGCAACCAGCCCTG                                           |                                                               |
|            | TP53-6F       | CACTGATTGCTCTTAGGTCT                                           |                                                               |
|            | TP53-6R       | AGTTGCAAACCAGACCTCAGG                                          |                                                               |
|            | TP53-7F       | GCCACAGGTCTCCCCAAGGC                                           |                                                               |
|            | TP53-7R       | CAGTGTGCAGGGTGGCAAGT                                           |                                                               |
|            | TP53-8F       | GACCTGATTTCCCTTACTGCC                                          |                                                               |
|            | TP53-8R       | CCACCCGCTTCTTGTCTGTCT                                          |                                                               |
|            | PTT           | PTT-I-F                                                        | GGATCCTAATACGACTCACTATAGGGAGACCACCATGATGGCCGCGCACAGGCCGGTGAAT |
|            |               | PTT-I-R                                                        | TGACAGGAACCTTCTATCTGCCTGCTTA                                  |
|            |               | PTT-II-F                                                       | GGATCCTAATACGACTCACTATAGGGAGACCACCATGATGGTGAACCTAATTCATGCAGAT |
|            |               | PTT-II-R                                                       | TGTCAAATTTCTGTGCCTTG                                          |
| PTT-III-F  |               | GGATCCTAATACGACTCACTATAGGGAGACCACCATGATGGAAGCAGTAGTTTCACTT     |                                                               |
| PTT-III-R  |               | TAGGACTTTTGTTCGCTCTGCTGA                                       |                                                               |
| PTT-IV-F   |               | GGATCCTAATACGACTCACTATAGGGAGACCACCATGGAGTACACCAAGTATCATGAG     |                                                               |
| PTT-IV-R   |               | TATACGGAGACTATCTAAAGTATGCAG                                    |                                                               |
| PTT-V-F    |               | GGATCCTAATACGACTCACTATAGGGAGACCACCATGATGGAGGCATGCATGAGAGATATTC |                                                               |
| PTT-V-R    |               | TCTGCACITGGCTTGGCGAT                                           |                                                               |
